# Supplementary material for: Multi-omics analysis reveals the mechanism of torularhodin accumulation in the mutant Rhodosporidium toruloides A1-15 under nitrogen-limited conditions
Source: Royal Society of Chemistry journal article supplement (doi:10.1039/d3fo01097j), 2023-01-01
Supplement: d3fo01097j1.pdf [file d3fo01097j1.pdf]

## Supplementary information

# Multi-omics analysis reveals the mechanism of torularhodin accumulation in the mutant *Rhodospiridium toruloides* A1-15 under nitrogen-limited conditions

Mengyang Liu<sup>a</sup>, Haitao Wang<sup>a</sup>, Xu Yan<sup>a</sup>, Sufang Zhang<sup>a</sup>, Chaofan Ji<sup>a</sup>, Yingxi Chen<sup>a</sup>, Beiwei

Zhu<sup>a</sup>, Xinping Lin<sup>a,\*</sup>

*<sup>a</sup> National Engineering Research Center of Seafood, Collaborative Innovation Center of Seafood Deep Processing, Liaoning Province Collaborative Innovation Center for Marine Food Deep Processing, School of Food Science and Technology, Dalian Polytechnic University, Dalian 116034, People's Republic of China*

\* Corresponding authors:

Beiwei Zhu, Tel.: +86041186323262. E-mail: zhubeiwei@163.com

Xinping Lin, Tel.: +86041186318675; fax: +86041186318655. E-mail: [yingchaer@163.com](mailto:yingchaer@163.com)

Mengyang Liu, E-mail: mengyangliu@hotmail.com

Haitao Wang, E-mail: wanght@dlpu.edu.cn

Xu Yan, E-mail, 921432992@qq.com

Sufang Zhang, E-mail: zhangsf@dlpu.edu.cn

Chaofan Ji, E-mail: jichaofan@outlook.com

Yingxi Chen, E-mail: yingxichen24@163.com

**Table S1. Sample sequencing data evaluation results and statistical results of samples mapped to genome**

| Sample | Raw Reads  | Raw Bases | Clean Reads | Clean Bases | Q30        | GC     | Total reads | Total mapped reads   | Multiple mapped   | Uniquely mapped      | Non-splice reads     | Splice reads         | Reads mapped in proper pairs |
|--------|------------|-----------|-------------|-------------|------------|--------|-------------|----------------------|-------------------|----------------------|----------------------|----------------------|------------------------------|
| A01    | 42.07<br>M | 6.31G     | 41.47<br>M  | 6.08G       | 0.957<br>6 | 0.6324 | 41466530    | 40454242<br>(97.56%) | 360699<br>(0.87%) | 40093543<br>(96.69%) | 23357491<br>(56.33%) | 16736052<br>(40.36%) | 39363712<br>(94.93%)         |
| A02    | 43.88<br>M | 6.58G     | 43.25<br>M  | 6.33G       | 0.957<br>4 | 0.6327 | 43245102    | 42155890<br>(97.48%) | 379109<br>(0.88%) | 41776781<br>(96.60%) | 24880874<br>(57.53%) | 16895907<br>(39.07%) | 41013908<br>(94.84%)         |
| A03    | 42.53<br>M | 6.38G     | 41.93<br>M  | 6.14G       | 0.957<br>5 | 0.6325 | 41934212    | 40892189<br>(97.52%) | 365537<br>(0.87%) | 40526652<br>(96.64%) | 23738264<br>(56.61%) | 16788388<br>(40.04%) | 39771280<br>(94.84%)         |
| N01    | 44.14<br>M | 6.62G     | 43.52<br>M  | 6.38G       | 0.957<br>6 | 0.6317 | 43521768    | 42452156<br>(97.54%) | 381427<br>(0.88%) | 42070729<br>(96.67%) | 24621298<br>(56.57%) | 17449431<br>(40.09%) | 41329990<br>(94.96%)         |
| N02    | 48.07<br>M | 7.21G     | 47.37<br>M  | 6.94G       | 0.957      | 0.6317 | 47368770    | 46182815<br>(97.50%) | 423916<br>(0.89%) | 45758899<br>(96.60%) | 26705514<br>(56.38%) | 19053385<br>(40.22%) | 44922038<br>(94.83%)         |
| N03    | 47.69<br>M | 7.15G     | 46.97<br>M  | 6.86G       | 0.957<br>2 | 0.6317 | 46974854    | 45786480<br>(97.47%) | 415092<br>(0.88%) | 45371388<br>(96.59%) | 26771697<br>(56.99%) | 18599691<br>(39.59%) | 44513678<br>(94.76%)         |

**Table S2. Abbreviations in Figure 3c.**

---

|              |                                     |
|--------------|-------------------------------------|
| G-1-P        | glucose-1-phosphate                 |
| G-6-P        | glucose-6-phosphate                 |
| F-6-P        | fructose-6-phosphate                |
| F-1,6-2P     | fructose-1,6-bisphosphate           |
| G-3-P        | glyceraldehyde 3-phosphate          |
| G-1,3-2P     | glycerate-1,3-bisphosphate          |
| 3-PGA        | 3-phosphoglyceric acid              |
| 2-PGA        | 2-phosphoglyceric acid              |
| PEP          | phosphoenolpyruvate                 |
| OAA          | oxaloacetate                        |
| DHAP         | dihydroxyacetonephosphate           |
| Glycerol-3-P | glycerol 3-phosphate                |
| Acyl-DHAP    | acyl dihydroxyacetonephosphate      |
| Lyso-PA      | lysophosphatidic acid               |
| PA           | phosphatidic acid                   |
| CDP-DAG      | cytidine diphosphate-diacylglycerol |
| PGP          | Phosphatidylglycerophosphate        |
| PG           | Phosphatidylglycerol                |
| PC           | phosphatidylcholine                 |
| PE           | phosphatidylethanolamine            |
| DG           | diacylglycerol                      |
| TG           | triacylglycerol                     |
| FFA          | free fatty acid                     |

---

**Table S3. Genes used in this work and their expression in NP11 and A1-15 under nitrogen limitation.**

| Classification                                         | Gene Name     | GeneID                              | Annotation                                                                             | Raw data           |                    |                    |                    |                    |                    | Fold change | Statistics test |
|--------------------------------------------------------|---------------|-------------------------------------|----------------------------------------------------------------------------------------|--------------------|--------------------|--------------------|--------------------|--------------------|--------------------|-------------|-----------------|
|                                                        |               |                                     |                                                                                        | Expression<br>_N01 | Expression<br>_N02 | Expression<br>_N03 | Expression<br>_A01 | Expression<br>_A02 | Expression<br>_A03 | A/N         | P-value         |
| Central nitrogen<br>metabolism and amino<br>metabolism | <i>GDH1</i>   | RHTO_04650                          | glutamate dehydrogenase (NADP+)                                                        | 972.1543           | 930.9495           | 945.3012           | 885.2153           | 810.0551           | 847.3380           | 1.0030      | 0.9558          |
|                                                        | <i>GLN1</i>   | RHTO_00673                          | glutamine synthetase                                                                   | 2174.8045          | 2308.3914          | 2086.9063          | 2251.0520          | 2170.4779          | 2218.2720          | 1.1365      | 0.0746          |
|                                                        | <i>GDH2</i>   | RHTO_07718                          | glutamate dehydrogenase (NAD+)                                                         | 65.9541            | 82.1651            | 72.7710            | 59.8273            | 109.6944           | 64.6140            | 1.2225      | 0.3239          |
|                                                        | <i>GLT2</i>   | RHTO_00025                          | GOGAT, glutamate synthase                                                              | 224.1174           | 204.4633           | 231.9863           | 225.6536           | 265.9902           | 236.9154           | 1.2511      | 0.0329          |
|                                                        | <i>GLN2</i>   | RHTO_00401                          | glutamine synthetase                                                                   | 111.0628           | 114.6364           | 104.2093           | 87.9092            | 62.7818            | 83.7777            | 0.7908      | 0.0009          |
|                                                        | <i>MEP1</i>   | RHTO_01846                          | ammonium transmembrane transporter                                                     | 161.2949           | 163.8978           | 165.0777           | 154.7421           | 150.9260           | 151.4269           | 1.0496      | 0.4650          |
|                                                        | <i>MEP2</i>   | RHTO_01680                          | ammonium transmembrane transporter                                                     | 1538.5418          | 1540.2357          | 1525.2481          | 1942.3939          | 1712.5009          | 1940.9285          | 1.3626      | 0.0000          |
|                                                        | <i>AAT</i>    | RHTO_01882                          | amino acid transporter                                                                 | 491.6130           | 480.7860           | 475.2991           | 273.8415           | 229.5760           | 269.2025           | 0.5973      | 0.0000          |
|                                                        | <i>NAAP</i>   | RHTO_04969                          | neutral amino acid permease                                                            | 62.9711            | 66.5847            | 64.8391            | 94.1434            | 118.6521           | 99.8907            | 1.8271      | 0.0000          |
|                                                        | <i>DAAP</i>   | RHTO_07825                          | dicarboxylic amino acid permease                                                       | 85.5700            | 85.5951            | 82.7376            | 150.8974           | 136.0753           | 146.2100           | 1.9147      | 0.0000          |
|                                                        | <i>AATT1</i>  | RHTO_01079                          | amino acid transmembrane transporter                                                   | 12.8024            | 13.3916            | 12.2065            | 79.8322            | 64.6164            | 79.0022            | 6.5008      | 0.0000          |
|                                                        | <i>AATT2</i>  | RHTO_07915                          | amino acid transmembrane transporter                                                   | 511.1890           | 505.2897           | 515.7411           | 611.8914           | 607.5900           | 568.7076           | 1.3162      | 0.0003          |
|                                                        | <i>ILVD</i>   | RHTO_08062                          | dihydroxy-acid dehydratase                                                             | 2.8637             | 2.4117             | 3.0829             | 1.2313             | 1.1670             | 1.3788             | 0.5075      | 0.0000          |
|                                                        | <i>ACADM</i>  | RHTO_04971                          | medium-chain-acyl-CoA dehydrogenase                                                    | 81.9498            | 85.3991            | 74.8740            | 147.9645           | 146.8659           | 145.8739           | 2.0478      | 0.0000          |
|                                                        | <i>ACADSB</i> | RHTO_03594                          | short/branched chain acyl-CoA dehydrogenase                                            | 106.4742           | 116.4739           | 105.4993           | 146.5585           | 175.7246           | 141.9770           | 1.6040      | 0.0001          |
|                                                        | <i>UBC</i>    | RHTO_06133                          | ubiquitin C                                                                            | 1334.5282          | 1541.0297          | 1203.5526          | 1479.9325          | 2282.2610          | 1601.5290          | 1.5041      | 0.0168          |
|                                                        | <i>VCP</i>    | RHTO_04629                          | transitional endoplasmic reticulum ATPase                                              | 300.7434           | 322.3281           | 302.0208           | 321.9729           | 442.7580           | 331.2965           | 1.3514      | 0.0335          |
|                                                        | <i>PEAP</i>   | RHTO_06300                          | pepsinogen A2 precursor                                                                | 69.7921            | 67.0134            | 66.8421            | 98.7585            | 87.7564            | 105.9765           | 1.6091      | 0.0000          |
|                                                        | <i>CTSD</i>   | RHTO_06029                          | aspartic-type endopeptidase                                                            | 31.9159            | 31.8148            | 32.7802            | 43.6260            | 31.6372            | 42.4967            | 1.3595      | 0.0000          |
|                                                        | <i>CYC1</i>   | RHTO_03214                          | cyclin                                                                                 | 65.5856            | 84.4208            | 75.3995            | 185.6903           | 338.9104           | 150.0311           | 3.4693      | 0.0000          |
| <i>CYC2</i>                                            | RHTO_03715    | cyclin                              | 46.5475                                                                                | 44.5625            | 48.5517            | 87.8704            | 90.7758            | 96.9194            | 2.2233             | 0.0000      |                 |
| <i>CPLC1</i>                                           | RHTO_04254    | G1/S-specific cyclin PLC1           | 187.3548                                                                               | 180.4238           | 178.8758           | 258.0211           | 498.3947           | 269.9128           | 2.1737             | 0.0002      |                 |
| <i>CPHO80</i>                                          | RHTO_08156    | protein of Cyclin PHO80-like family | 33.2761                                                                                | 31.5015            | 34.3722            | 36.8932            | 54.4126            | 42.6796            | 1.5440             | 0.0033      |                 |
| Lipid metabolism                                       | <i>GPD1</i>   | RHTO_08013                          | glycerol-3-phosphate dehydrogenase complex                                             | 40.0447            | 36.8237            | 37.8821            | 43.5414            | 38.2444            | 38.0771            | 1.1730      | 0.0212          |
|                                                        | <i>GPD2</i>   | RHTO_02273                          | glycerol-3-phosphate dehydrogenase (NAD+)                                              | 84.2417            | 86.0734            | 81.5150            | 110.4809           | 91.0125            | 110.1786           | 1.3837      | 0.0000          |
|                                                        | <i>GPD3</i>   | RHTO_07665                          | glycerol-3-phosphate dehydrogenase                                                     | 47.0044            | 47.8223            | 47.1454            | 53.3141            | 93.6148            | 59.3641            | 1.6731      | 0.0059          |
|                                                        | <i>GNPAT1</i> | RHTO_06391                          | glyceronephosphate O-acyltransferase                                                   | 23.5573            | 22.8437            | 24.6652            | 21.5173            | 19.2865            | 21.5831            | 0.9848      | 0.7758          |
|                                                        | <i>GAT1</i>   | RHTO_03058                          | glycerol-3-phosphate O-acyltransferase /<br>dihydroxyacetone phosphate acyltransferase | 235.7290           | 238.9775           | 242.5696           | 287.3374           | 296.1247           | 279.2324           | 1.3575      | 0.0001          |
|                                                        | <i>AYR1</i>   | RHTO_03193                          | 1-acylglycerone phosphate reductase                                                    | 20.5670            | 17.7116            | 16.9012            | 14.1669            | 10.3616            | 17.4528            | 0.8461      | 0.1768          |
|                                                        | <i>SLC1</i>   | RHTO_06718                          | 1-acylglycerol-3-phosphate acyltransferase                                             | 111.6805           | 105.8472           | 111.8162           | 129.7742           | 96.8213            | 121.9597           | 1.1810      | 0.0013          |
|                                                        | <i>GPSGA</i>  | RHTO_04998                          | CDP-diacylglycerol-glycerol-3-phosphate 3-<br>phosphatidyltransferase                  | 24.9630            | 25.1103            | 26.0179            | 29.9602            | 46.7802            | 30.9398            | 1.6235      | 0.0044          |
|                                                        | <i>GEP4</i>   | RHTO_07538                          | protein of HAD-superfamily phosphatase,<br>subfamily IIIA                              | 75.7830            | 88.0527            | 76.3342            | 98.2009            | 222.7285           | 102.4141           | 2.0532      | 0.0038          |
|                                                        | <i>FAS1</i>   | RHTO_02032                          | fatty acid synthase subunit beta, fungi type                                           | 162.5456           | 145.8220           | 157.6016           | 192.6041           | 188.8712           | 197.6613           | 1.3994      | 0.0000          |
|                                                        | <i>FAS2</i>   | RHTO_02139                          | fatty acid synthase subunit alpha, fungi type                                          | 168.2326           | 155.8607           | 174.7382           | 226.5294           | 244.8430           | 238.7609           | 1.6089      | 0.0000          |
|                                                        | <i>ACP1</i>   | RHTO_02545                          | [acyl-carrier-protein]                                                                 | 123.9665           | 139.3824           | 127.3351           | 164.4029           | 251.5114           | 177.8251           | 1.7395      | 0.0006          |
|                                                        | <i>ACP2</i>   | RHTO_01048                          | acyl-carrier protein                                                                   | 671.0330           | 689.9716           | 643.1398           | 601.2855           | 541.7157           | 614.5920           | 0.9832      | 0.7619          |

|                                                            |               |            |                                                            |           |           |           |           |           |           |        |        |
|------------------------------------------------------------|---------------|------------|------------------------------------------------------------|-----------|-----------|-----------|-----------|-----------|-----------|--------|--------|
|                                                            | <i>ACCI</i>   | RHTO_02004 | acetyl-CoA carboxylase                                     | 191.2040  | 173.7774  | 196.6000  | 243.2968  | 243.5509  | 249.2246  | 1.4775 | 0.0000 |
|                                                            | <i>TGL1</i>   | RHTO_00993 | triacylglycerol lipase                                     | 54.2179   | 50.4508   | 54.8184   | 58.5481   | 44.4611   | 51.4110   | 1.0821 | 0.1455 |
|                                                            | <i>TGL2</i>   | RHTO_06751 | lipase 2                                                   | 30.1829   | 29.5103   | 28.8881   | 25.9857   | 30.1486   | 26.6715   | 1.0586 | 0.5868 |
|                                                            | <i>ATG15</i>  | RHTO_00361 | triacylglycerol lipase ATG15-like protein                  | 103.9339  | 99.5988   | 106.0200  | 96.4925   | 79.5869   | 92.6941   | 0.9719 | 0.4676 |
|                                                            | <i>FAA1</i>   | RHTO_00058 | long-chain acyl-CoA synthetase                             | 103.8543  | 104.6253  | 99.7944   | 123.6782  | 110.8905  | 120.2137  | 1.2911 | 0.0000 |
|                                                            | <i>FAA2</i>   | RHTO_04350 | long-chain acyl-CoA synthetase                             | 19.7578   | 17.0641   | 18.5169   | 25.7741   | 18.7174   | 24.4724   | 1.3900 | 0.0000 |
|                                                            | <i>FAA3</i>   | RHTO_04957 | long-chain acyl-CoA synthetase                             | 44.0916   | 44.3488   | 42.0134   | 49.6622   | 43.5869   | 47.6065   | 1.2104 | 0.0006 |
|                                                            | <i>CRAT</i>   | RHTO_00095 | carnitine O-acetyltransferase                              | 46.3890   | 48.2254   | 47.7145   | 81.2943   | 90.9673   | 77.8222   | 1.9897 | 0.0000 |
|                                                            | <i>CACT</i>   | RHTO_01354 | carnitine acyl carnitine carrier, mitochondrial            | 60.3271   | 63.7753   | 58.0731   | 105.3601  | 90.4076   | 97.1787   | 1.8015 | 0.0000 |
|                                                            | <i>ABCT1</i>  | RHTO_06195 | ABC fatty acid transporter                                 | 69.7029   | 71.5407   | 73.9882   | 112.9540  | 114.0465  | 110.4471  | 1.7679 | 0.0000 |
|                                                            | <i>ABCT2</i>  | RHTO_04105 | peroxisomal ABC transporter                                | 80.0420   | 73.7057   | 77.2565   | 101.1996  | 84.0272   | 97.1552   | 1.3687 | 0.0000 |
|                                                            | <i>ACOX1</i>  | RHTO_03890 | acyl-CoA oxidase                                           | 25.7386   | 23.6892   | 26.1424   | 43.7321   | 46.9431   | 45.2056   | 2.0314 | 0.0000 |
|                                                            | <i>ACOX2</i>  | RHTO_03776 | acyl-CoA oxidase                                           | 64.5442   | 79.8492   | 68.3700   | 115.3287  | 231.7014  | 129.8031  | 2.5926 | 0.0000 |
|                                                            | <i>FOX2</i>   | RHTO_06581 | multifunctional beta-oxidation protein                     | 61.4052   | 62.3069   | 61.2147   | 90.8876   | 92.5501   | 97.6859   | 1.7117 | 0.0000 |
|                                                            | <i>ACADSB</i> | RHTO_03594 | short/branched chain acyl-CoA dehydrogenase                | 106.4742  | 116.4739  | 105.4993  | 146.5585  | 175.7246  | 141.9770  | 1.6040 | 0.0001 |
|                                                            | <i>ACDM</i>   | RHTO_04971 | medium-chain-acyl-CoA dehydrogenase                        | 81.9498   | 85.3991   | 74.8740   | 147.9645  | 146.8659  | 145.8739  | 2.0478 | 0.0000 |
|                                                            | <i>ACADVL</i> | RHTO_00397 | acyl-CoA dehydrogenase                                     | 160.6708  | 171.4257  | 153.9891  | 261.7228  | 259.9650  | 247.1596  | 1.7818 | 0.0000 |
|                                                            | <i>ECH1</i>   | RHTO_05407 | enoyl-CoA hydratase                                        | 85.6731   | 91.6327   | 82.1567   | 88.5138   | 65.0956   | 85.9628   | 1.0282 | 0.6957 |
|                                                            | <i>ECH2</i>   | RHTO_02517 | enoyl-CoA hydratase                                        | 12.5322   | 9.0900    | 12.0771   | 13.6634   | 6.1341    | 11.6739   | 1.0293 | 0.8700 |
|                                                            | <i>ECH3</i>   | RHTO_04298 | enoyl-CoA hydratase/isomerase family protein               | 30.4464   | 35.0598   | 31.9089   | 33.6203   | 33.1216   | 36.7467   | 1.1928 | 0.0400 |
|                                                            | <i>HCD1</i>   | RHTO_05520 | 3-hydroxyacyl-CoA dehydrogenase                            | 78.7839   | 81.7910   | 79.5735   | 117.1546  | 86.9735   | 106.4595  | 1.4425 | 0.0000 |
|                                                            | <i>ACA1</i>   | RHTO_00476 | 3-ketoacyl-CoA thiolase, mitochondrial                     | 198.4777  | 202.9607  | 200.9464  | 249.5323  | 213.0191  | 230.8891  | 1.2902 | 0.0000 |
|                                                            | <i>POT1</i>   | RHTO_02848 | 3-ketoacyl-CoA thiolase (POT1)                             | 77.4384   | 82.7779   | 71.3698   | 80.8206   | 112.9705  | 80.7977   | 1.3531 | 0.0476 |
|                                                            | <i>POT2</i>   | RHTO_07118 | 3-ketoacyl-coA thiolase peroxisomal A precursor            | 144.3345  | 155.3776  | 148.0164  | 172.4144  | 198.2737  | 152.5541  | 1.3262 | 0.0190 |
|                                                            | <i>POT3</i>   | RHTO_00300 | peroxisomal 3-ketoacyl-CoA thiolase                        | 44.6690   | 51.9757   | 40.9008   | 56.7338   | 59.2274   | 51.4341   | 1.3730 | 0.0060 |
|                                                            | <i>ACOX1</i>  | RHTO_03890 | acyl-CoA oxidase                                           | 25.7386   | 23.6892   | 26.1424   | 43.7321   | 46.9431   | 45.2056   | 2.0314 | 0.0000 |
|                                                            | <i>ACOX2</i>  | RHTO_03776 | acyl-CoA oxidase                                           | 64.5442   | 79.8492   | 68.3700   | 115.3287  | 231.7014  | 129.8031  | 2.5926 | 0.0000 |
| ROS generation                                             | <i>FTR1</i>   | RHTO_00148 | iron permease FTR1                                         | 301.4806  | 312.0726  | 299.0079  | 524.6837  | 647.7574  | 520.0769  | 2.1076 | 0.0000 |
|                                                            | <i>SIT1</i>   | RHTO_04727 | MFS transporter, siderochrome-iron transporter             | 201.5423  | 216.4817  | 189.1932  | 353.3032  | 400.7994  | 373.3573  | 2.0989 | 0.0000 |
|                                                            | <i>FERB</i>   | RHTO_00765 | ferric-chelate reductase                                   | 132.6650  | 134.1094  | 132.1583  | 227.5871  | 212.6958  | 218.0789  | 1.8552 | 0.0000 |
|                                                            | <i>ARN</i>    | RHTO_01307 | MFS transporter, siderophore-iron:H <sup>+</sup> symporter | 76.6370   | 80.5255   | 75.6464   | 158.8036  | 223.6071  | 170.8844  | 2.7114 | 0.0000 |
|                                                            | <i>FOX2</i>   | RHTO_06581 | multifunctional beta-oxidation protein                     | 61.4052   | 62.3069   | 61.2147   | 90.8876   | 92.5501   | 97.6859   | 1.7117 | 0.0000 |
|                                                            | <i>AOX</i>    | RHTO_07747 | alternative oxidase                                        | 1251.3892 | 1329.0272 | 1207.8544 | 1445.2288 | 2148.4537 | 1603.4705 | 1.5677 | 0.0032 |
|                                                            | <i>CAT</i>    | RHTO_01370 | catalase A                                                 | 2.6398    | 2.7433    | 2.1755    | 4.9694    | 4.9974    | 4.7322    | 2.1881 | 0.0000 |
| ROS degradation                                            | <i>SOD1</i>   | RHTO_00206 | superoxide dismutase, Fe-Mn family                         | 839.0318  | 849.4277  | 799.1885  | 922.6614  | 797.7976  | 944.7385  | 1.1994 | 0.0003 |
|                                                            | <i>SOD2</i>   | RHTO_06854 | superoxide dismutase, Fe-Mn family                         | 144.7967  | 132.9024  | 130.9181  | 127.8257  | 102.7930  | 114.9965  | 0.9464 | 0.3402 |
|                                                            | <i>SOD3</i>   | RHTO_08091 | superoxide dismutase, Fe-Mn family                         | 10.3082   | 14.5561   | 15.2581   | 8.9422    | 9.9365    | 8.4538    | 0.7694 | 0.0912 |
|                                                            | <i>CPO</i>    | RHTO_00268 | chloroperoxidase-like protein                              | 39.1027   | 38.9693   | 39.6087   | 31.1498   | 33.5491   | 30.3678   | 0.9126 | 0.3255 |
|                                                            | <i>CYTCl</i>  | RHTO_06193 | cytochrome-c peroxidase                                    | 350.1928  | 343.9367  | 338.2036  | 368.4970  | 285.5695  | 353.4281  | 1.0895 | 0.0599 |
|                                                            | <i>CYTC2</i>  | RHTO_07451 | cytochrome-c peroxidase                                    | 266.3230  | 289.0901  | 264.4046  | 318.8791  | 336.5888  | 313.5179  | 1.3340 | 0.0014 |
| Terpenoids skeleton extension and carotenoids biosynthesis | <i>ACAT</i>   | RHTO_02048 | acetyl-CoA C-acetyltransferase                             | 165.9370  | 162.3392  | 171.0256  | 165.4551  | 181.1392  | 161.4674  | 1.1514 | 0.1319 |
|                                                            | <i>HMGCS</i>  | RHTO_02305 | hydroxymethylglutaryl-CoA synthase                         | 139.3315  | 140.7862  | 130.2692  | 139.4639  | 140.6413  | 130.3869  | 1.1278 | 0.1584 |
|                                                            | <i>HMGA</i>   | RHTO_04045 | hydroxymethylglutaryl-CoA reductase (NADPH)                | 41.6582   | 37.0881   | 41.3199   | 41.3811   | 40.9416   | 42.6466   | 1.1724 | 0.0232 |
|                                                            | <i>MVAK2</i>  | RHTO_02073 | phosphomevalonate kinase                                   | 55.4857   | 55.7992   | 55.5693   | 57.9357   | 51.9063   | 53.0425   | 1.0961 | 0.1275 |
|                                                            | <i>MVD</i>    | RHTO_06005 | diphosphomevalonate decarboxylase                          | 40.9683   | 38.9102   | 41.0231   | 38.1669   | 19.4880   | 33.9972   | 0.8359 | 0.1643 |

|              |            |                                                                               |          |          |          |          |          |          |        |        |
|--------------|------------|-------------------------------------------------------------------------------|----------|----------|----------|----------|----------|----------|--------|--------|
| <i>FDPS</i>  | RHTO_01660 | farnesyl diphosphate synthase                                                 | 58.8020  | 53.3836  | 54.8537  | 52.8678  | 33.4713  | 49.0055  | 0.8993 | 0.2364 |
| <i>GGPS</i>  | RHTO_02504 | geranylgeranyl diphosphate synthase, type III                                 | 72.7102  | 68.3254  | 68.7630  | 105.3020 | 123.2319 | 108.6778 | 1.8215 | 0.0000 |
| <i>CRTY</i>  | RHTO_04605 | phytoene synthase                                                             | 42.8421  | 43.5711  | 46.6221  | 77.9883  | 79.8084  | 76.3016  | 1.9854 | 0.0000 |
| <i>CRTI</i>  | RHTO_04602 | phytoene dehydrogenase                                                        | 120.2258 | 122.1750 | 127.2721 | 345.2831 | 443.3679 | 356.3384 | 3.5250 | 0.0000 |
| <i>FNTB1</i> | RHTO_05830 | protein<br>farnesyltransferase/geranylgeranyltransferase type-1 subunit alpha | 45.5079  | 43.5820  | 44.4032  | 28.0030  | 19.1551  | 27.4693  | 0.6220 | 0.0000 |
| <i>FNTB2</i> | RHTO_06679 | protein<br>farnesyltransferase/geranylgeranyltransferase type-1 subunit alpha | 91.4103  | 84.2579  | 90.6765  | 52.4449  | 40.2231  | 51.2268  | 0.6033 | 0.0000 |

---

\* N:NP11, A:A1-15

Figure S1

a

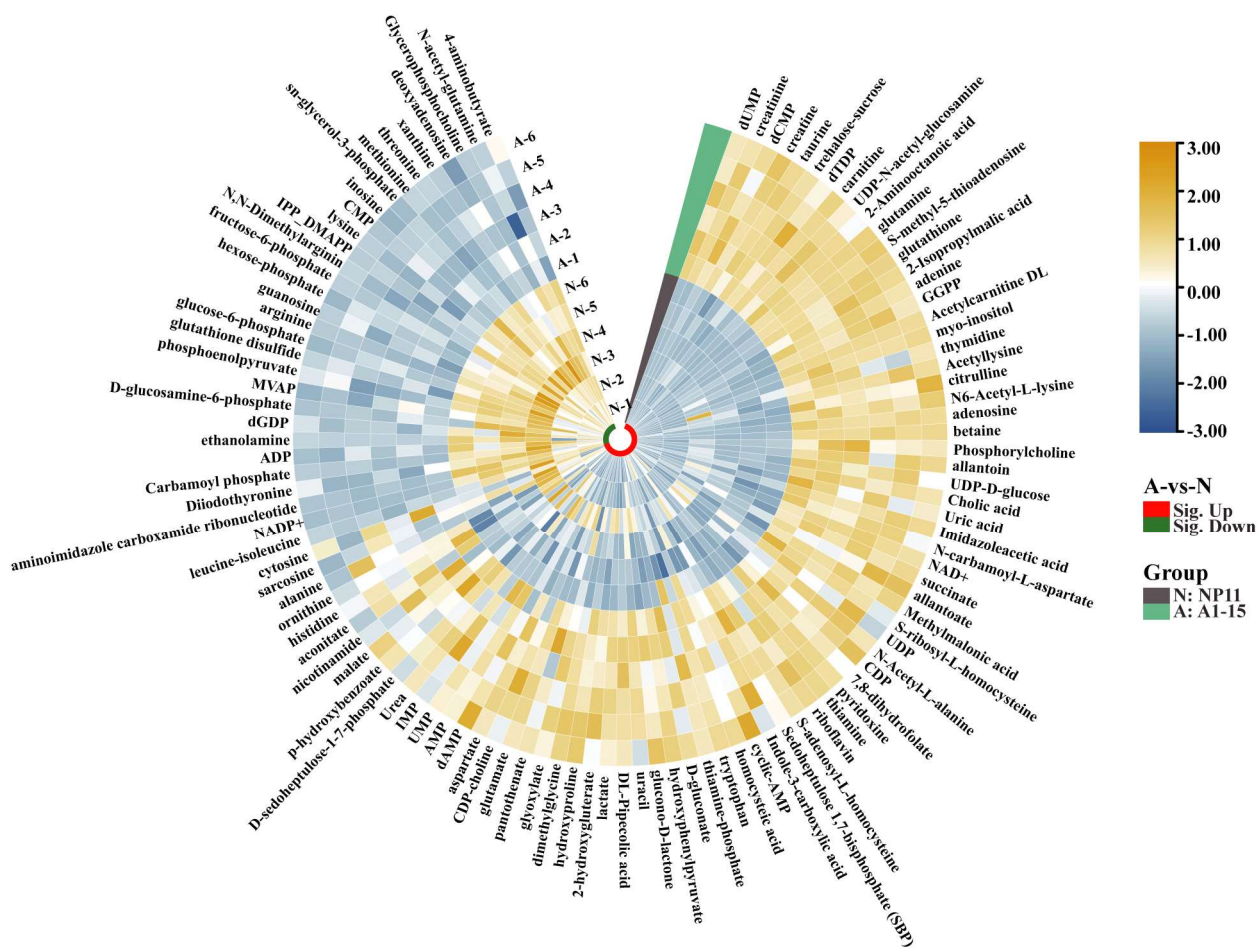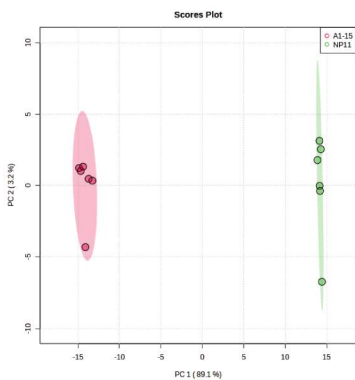

b

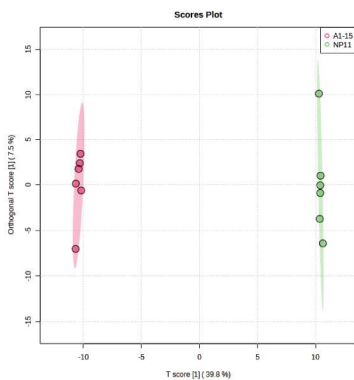

c

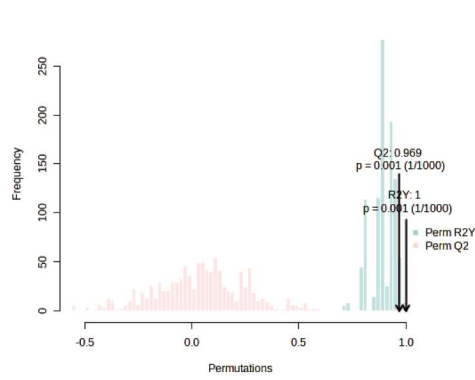

d

Figure S1. (a) Heat map of differential metabolites in A1-15 compared to NP11 under nitrogen limitation. (b) PCA score plot of all metabolite features. (c) OPLS-DA score plot of all metabolite features, (d) Permutation analysis, showing the observed and cross-validated R2Y and Q2 coefficients

Figure S2

a

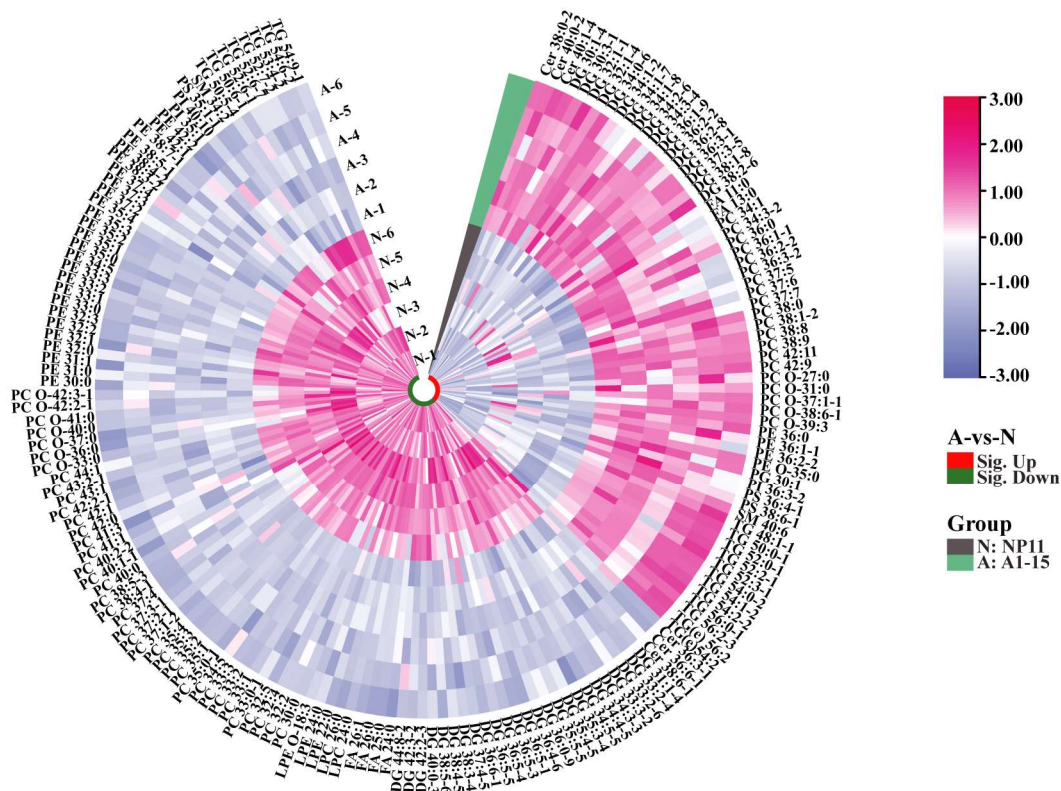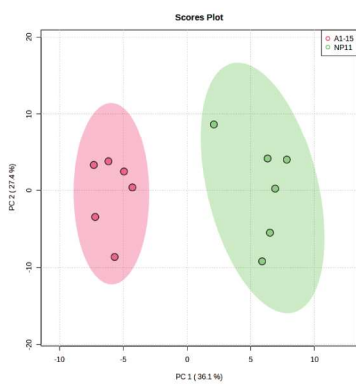

b

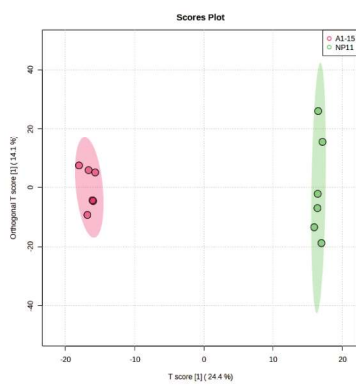

c

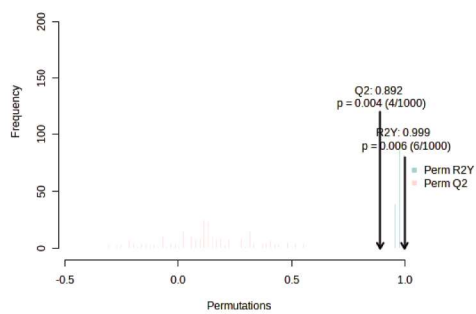

d

Figure S2. (a) Heat map of the differential lipids in A1-15 compared to NP11 under nitrogen limitation. (b) PCA score plot of all lipid features. (c) OPLS-DA score plot of all lipid features. (d) Permutation analysis, showing the observed and cross-validated R2Y and Q2 coefficients



Figure S3

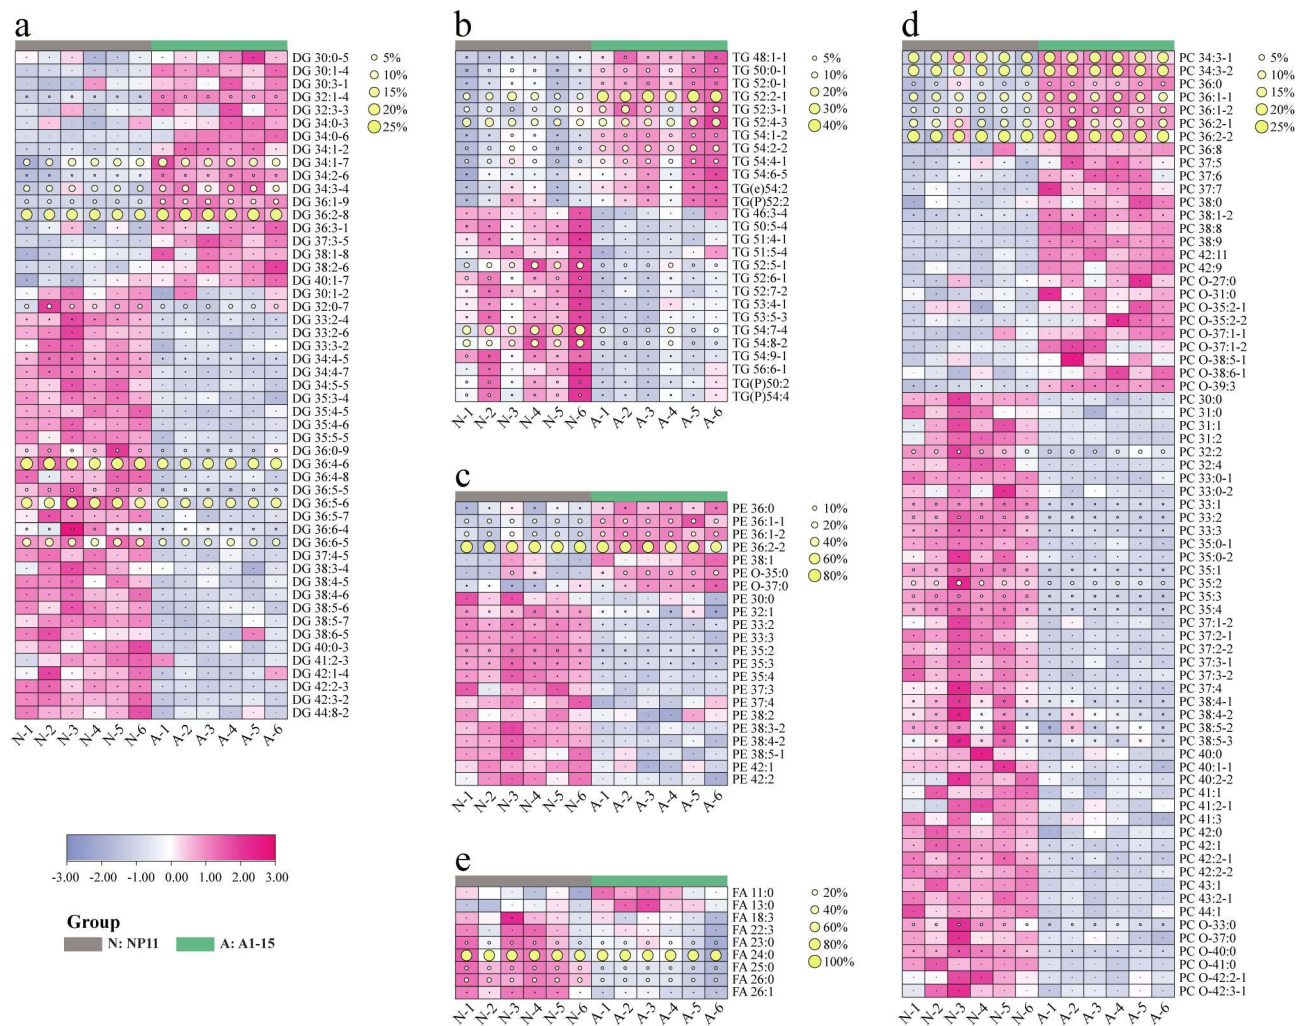

Figure S3. Heat map of five classes differential lipids of NP11 and A1-15 according to lipidomics analysis (complete version). (a)DGs, (b)TGs, (c)PEs, (d)PCs, (e)FAs. The size of the circle indicates the percentage of its corresponding lipid in that lipid class in that sample.
